# Supplementary material for: The Usefulness of Evaluating Performance of Activities in Daily Living in the Diagnosis of Mild Cognitive Disorders
Source: MDPI journal article supplement (doi:10.3390/ijerph182111623), 2021-11-05
Supplement: s1 [file s1]

Table S1: The items of basic-, instrumental - and advanced Activities of Daily Living of the Brussels Integrated Activities of Daily Living tool.

| Basic- Activities of Daily Living items |                                                  |          |                                                                                                                                                                                                                                                                                                                                               |
|-----------------------------------------|--------------------------------------------------|----------|-----------------------------------------------------------------------------------------------------------------------------------------------------------------------------------------------------------------------------------------------------------------------------------------------------------------------------------------------|
| Item according to Katz's Index          | ICF-activity                                     | ICF-code | ICF-definition                                                                                                                                                                                                                                                                                                                                |
| Bathing                                 | Washing oneself                                  | d510     | Washing and drying one's whole body, or body parts, using water and appropriate cleaning and drying materials or methods, such as bathing, showering, washing hands and feet, face and hair, and drying with a towel.                                                                                                                         |
| Dressing                                | Dressing                                         | d540     | Carrying out the coordinated actions and tasks of putting on and taking off clothes and footwear in sequence and in keeping with climatic and social conditions, such as by putting on, adjusting and removing shirts, skirts, blouses, pants, undergarments, saris, kimono, tights, hats, gloves, coats, shoes, boots, sandals and slippers. |
| Transferring                            | Indoor Mobility and changing basic body position | d410     | Getting into and out of a body position and moving from one location to another, such as getting up out of a chair to lie down on a bed, and getting into and out of positions of kneeling or squatting.                                                                                                                                      |
|                                         | Transferring oneself                             | d420     | Moving from one surface to another, such as sliding along a bench or moving from a bed to a chair, without changing body position.                                                                                                                                                                                                            |
|                                         | Walking                                          | d450     | Moving along a surface on foot, step by step, so that one foot is always on the ground, such as when strolling, sauntering, walking forwards, backwards, or sideways.                                                                                                                                                                         |
| Continence                              | Regulating urination                             | d5300    | Coordinating and managing urination, such as by indicating need, getting into the proper position, choosing and getting to an appropriate place for urination, manipulating clothing before and after urination, and cleaning oneself after urination.                                                                                        |
|                                         | Regulating defecation                            | d3501    | Coordinating and managing defecation, such as by indicating need, getting into the proper position, choosing and getting to an appropriate place for defecation, manipulating clothing before and after defecation, and cleaning oneself after defecation                                                                                     |
| Toileting                               | Toileting                                        | d530     | Planning and carrying out the elimination of human waste (urination and defecation), and cleaning oneself afterwards.                                                                                                                                                                                                                         |

|         |          |      |                                                                                                                                                                                                                                                                                         |
|---------|----------|------|-----------------------------------------------------------------------------------------------------------------------------------------------------------------------------------------------------------------------------------------------------------------------------------------|
| Feeding | Eating   | d550 | Carrying out the coordinated tasks and actions of eating food that has been served, bringing it to the mouth and consuming it in culturally acceptable ways, cutting or breaking food into pieces, opening bottles and cans, using eating implements, having meals, feasting or dining. |
|         | Drinking | d560 | Taking hold of a drink, bringing it to the mouth, and consuming the drink in culturally acceptable ways, mixing, stirring and pouring liquids for drinking, opening bottles and cans, drinking through a straw or drinking running water such as from a tap or a spring.                |

| Instrumental Activities of Daily Living |                                            |          |                                                                                                                                                                                                                                                                                                                                                                                                                                                                |
|-----------------------------------------|--------------------------------------------|----------|----------------------------------------------------------------------------------------------------------------------------------------------------------------------------------------------------------------------------------------------------------------------------------------------------------------------------------------------------------------------------------------------------------------------------------------------------------------|
| Item according to Lawton Scale          | ICF-activity                               | ICF-code | ICF-definition                                                                                                                                                                                                                                                                                                                                                                                                                                                 |
| Telephone use                           | Using communication devices and techniques | d360     | Using devices, techniques and other means for the purposes of communicating, such as calling a friend on the telephone.                                                                                                                                                                                                                                                                                                                                        |
| Using transportation                    | Using transportation                       | d470     | Using transportation to move around as a passenger, such as being driven in a car or on a bus, rickshaw, jitney, animal-powered vehicle, or private or public taxi, bus, train, tram, subway, boat or aircraft.                                                                                                                                                                                                                                                |
| Shopping                                | Shopping                                   | d6200    | Obtaining, in exchange for money, goods and services required for daily living (including instructing and supervising an intermediary to do the shopping), such as selecting food, drink, cleaning materials, household items or clothing in a shop or market; comparing quality and price of the items required, negotiating and paying for selected goods or services, and transporting goods.                                                               |
| Preparing food                          | Preparing meals                            | d630     | Planning, organising, cooking and serving simple and complex meals for oneself and others, such as by making a menu, selecting edible food and drink, getting together ingredients for preparing meals, cooking with heat and preparing cold foods and drinks, and serving the food.                                                                                                                                                                           |
| Housekeeping                            | Doing housework                            | d640     | Managing a household by cleaning the house, washing clothes, using household appliances, storing food and disposing of garbage, such as by sweeping, mopping, washing counters, walls and other surfaces; collecting and disposing of household garbage; tidying rooms, closets and drawers; collecting, washing, drying, folding and ironing clothes; cleaning footwear; using brooms, brushes and vacuum cleaners; using washing machines, driers and irons. |

|                                    |                              |       |                                                                                                                                                                                                                                                                                                                                                                                       |
|------------------------------------|------------------------------|-------|---------------------------------------------------------------------------------------------------------------------------------------------------------------------------------------------------------------------------------------------------------------------------------------------------------------------------------------------------------------------------------------|
| Doing laundry                      | Washing and drying clothes   | d6400 | Washing clothes and garments and hanging them out to dry in the air.                                                                                                                                                                                                                                                                                                                  |
| Doing handyman work                | Caring for household objects | d650  | Maintaining and repairing household and other personal objects, including house and contents, clothes, vehicles and assistive devices, and caring for plants and animals, such as painting or wallpapering rooms, fixing furniture, repairing plumbing, ensuring the proper working order of vehicles, watering plants, grooming and feeding pets and domestic animals.               |
| Responsibility for own medications | Maintaining one's health     | d5702 | Caring for oneself by being aware of the need and doing what is required to look after one's health, both to respond to risks to health and to prevent ill-health, such as by seeking professional assistance; following medical and other health advice; and avoiding risks to health such as physical injury, communicable diseases, drug-taking and sexually transmitted diseases. |
| Handling finance                   | Basic economic transitions   | d860  | Engaging in any form of simple economic transaction, such as using money to purchase food or bartering, exchanging goods or services; or saving money.                                                                                                                                                                                                                                |

| Advanced Activities of Daily Living       |            |                                                                                                                                                                     |                                 |
|-------------------------------------------|------------|---------------------------------------------------------------------------------------------------------------------------------------------------------------------|---------------------------------|
| ICF - activities Cluster                  | ICF - code | ICF - definition                                                                                                                                                    | Items                           |
| Sophisticated kitchen activities          | d6301      | Advanced cooking, complex meals with a large number of ingredients, using complex methods of preparation or making dinner with several courses; baking bread, cakes | Freezing or pickling vegetables |
|                                           |            |                                                                                                                                                                     | Baking bread, cakes             |
|                                           |            |                                                                                                                                                                     | Cooking complex meals           |
|                                           |            |                                                                                                                                                                     | Try out new dishes              |
|                                           |            |                                                                                                                                                                     | Making jam                      |
| Household appliances and daily technology | d6403      | The use of electronically equipment inside and outside the house, including reading and understanding manuals                                                       | Using Magnetron                 |
|                                           |            |                                                                                                                                                                     | Using Dish washer               |
|                                           |            |                                                                                                                                                                     | Using Oven                      |
|                                           |            |                                                                                                                                                                     | Using Coffee machine            |
|                                           |            |                                                                                                                                                                     | Using Kitchen aid               |
|                                           |            |                                                                                                                                                                     | Using Washing machine           |
|                                           |            |                                                                                                                                                                     | Using Drying machine            |
|                                           |            |                                                                                                                                                                     | Using Radio / CD                |
|                                           |            |                                                                                                                                                                     | Using TV                        |
|                                           |            |                                                                                                                                                                     | Using Video / DVD               |

|                                                             |              |                                                                                                                                                           |                                                                 |
|-------------------------------------------------------------|--------------|-----------------------------------------------------------------------------------------------------------------------------------------------------------|-----------------------------------------------------------------|
|                                                             |              |                                                                                                                                                           | Using Camera                                                    |
|                                                             |              |                                                                                                                                                           | Using Lawn mower                                                |
|                                                             |              |                                                                                                                                                           | Using Electric saw                                              |
|                                                             |              |                                                                                                                                                           | Using High pressure cleaner                                     |
|                                                             |              |                                                                                                                                                           | Using manuals explaining daily technology                       |
| High level gardening                                        | d6505        | To cultivate vegetables and special or rare plants                                                                                                        | /                                                               |
| Cognitive stimulating activities or intellectual activities | d166 & d9200 | Playing games, reading books, etc...; to read professional literature, books and magazines in other languages, use of computer programs, use of an agenda | Playing puzzles and brainteasers                                |
|                                                             |              |                                                                                                                                                           | Using PC programs                                               |
|                                                             |              |                                                                                                                                                           | Using internet                                                  |
|                                                             |              |                                                                                                                                                           | Using agenda                                                    |
|                                                             |              |                                                                                                                                                           | Reading books                                                   |
|                                                             |              |                                                                                                                                                           | Reading professional or educational literature, other languages |
|                                                             |              |                                                                                                                                                           | Writing books, poems, articles                                  |

|                                                               |               |                                                                                                                                                          |                                                                                    |
|---------------------------------------------------------------|---------------|----------------------------------------------------------------------------------------------------------------------------------------------------------|------------------------------------------------------------------------------------|
| Craftwork and arts                                            | d6500 & d9203 | Knitting, sewing, repairing clothes, reattaching buttons and fasteners; practicing arts like painting, sculpturing and others, playing music instruments | Crafting                                                                           |
|                                                               |               |                                                                                                                                                          | Playing music instrument                                                           |
|                                                               |               |                                                                                                                                                          | Practicing arts                                                                    |
| Complex economic activities or transactions                   | d865          | To be involved in some form of complex economic transactions like trading in commodities, the use of bank cards, 'money out the wall' system, PC-banking | Electronically banking, to pay electronically, to use money out of the wall system |
|                                                               |               |                                                                                                                                                          | Complex administration and banking                                                 |
| To communicate by using devices or techniques                 | d360          | The use of cell phones, corresponding through email                                                                                                      | Using a cell phone                                                                 |
|                                                               |               |                                                                                                                                                          | Writing a mail or a letter                                                         |
| Sports                                                        | d9201         | To be engage in informal or organized sports: group activities and sporting on your own, e.g. fishing, ride a bicycle                                    | Doing sports                                                                       |
|                                                               |               |                                                                                                                                                          | Riding bicycle                                                                     |
| Transportation by motorized vehicles                          | d475          | To drive a car, motorcycle                                                                                                                               | /                                                                                  |
| Self development/self realization/self educational activities | d9202 & d 810 | To develop oneself by formal or informal learning: attending a course, going to lectures, consuming arts (visiting exhibitions, musical performances)    | /                                                                                  |

|                                                           |              |                                                                                                                                                                                                                                                                                                                                                                                      |                                           |
|-----------------------------------------------------------|--------------|--------------------------------------------------------------------------------------------------------------------------------------------------------------------------------------------------------------------------------------------------------------------------------------------------------------------------------------------------------------------------------------|-------------------------------------------|
| To go on a holiday                                        | d920         | Going on holiday, in an own cottage or participating in group trips                                                                                                                                                                                                                                                                                                                  | /                                         |
| Caring for or assisting others                            | d660 & d6506 | To care for household members (mostly the partner), often by helping to handle medication, helping with bathing, dressing or assisting in transfers; or caring for (grand)children and to provide help in household tasks, to take care of pets, by feeding and cleaning them and exercising them                                                                                    | Helping (in the business of) the children |
|                                                           |              |                                                                                                                                                                                                                                                                                                                                                                                      | Taking care of partner                    |
|                                                           |              |                                                                                                                                                                                                                                                                                                                                                                                      | Taking care of (great) grand children     |
|                                                           |              |                                                                                                                                                                                                                                                                                                                                                                                      | Taking care of pets                       |
| Caring for household objects                              | d560         | Activities like painting, wallpapering rooms, fixing furniture, plumbing in the own place or in that of others                                                                                                                                                                                                                                                                       | /                                         |
| Semi-professional work                                    | d855         | To work as a volunteer, engaged in non-remunerative employment and performing 'semi-professional work': social jobs, administration, accountancy, often as a continuation of one's profession                                                                                                                                                                                        | /                                         |
| Engagement in organized social live or leisure activities | d910 & d9250 | Active participation in organized communities or societies by taking part in meetings, being member of the board, organizing activities for others or by participating in activities organized by others, like short trips and coffee moments; to be engaged in forms of activity only for amusement or relaxation, like to go out for dinner with partner, children, friends and to | Organising events                         |
|                                                           |              |                                                                                                                                                                                                                                                                                                                                                                                      | Making and keeping appointments           |
|                                                           |              |                                                                                                                                                                                                                                                                                                                                                                                      | Taking part in meetings, conversations    |



|  |  |                                                                                                                                                   |  |
|--|--|---------------------------------------------------------------------------------------------------------------------------------------------------|--|
|  |  | visit family. All activities clustered in this category encompass a social factor by doing things just for the fun of being together, socializing |  |
|--|--|---------------------------------------------------------------------------------------------------------------------------------------------------|--|
